# Supplementary material
Source: PubMed Central journal article supplement (PMC3201987)
Supplement: NIHMS330291-supplement-01.pdf [file NIHMS330291-supplement-01.pdf]

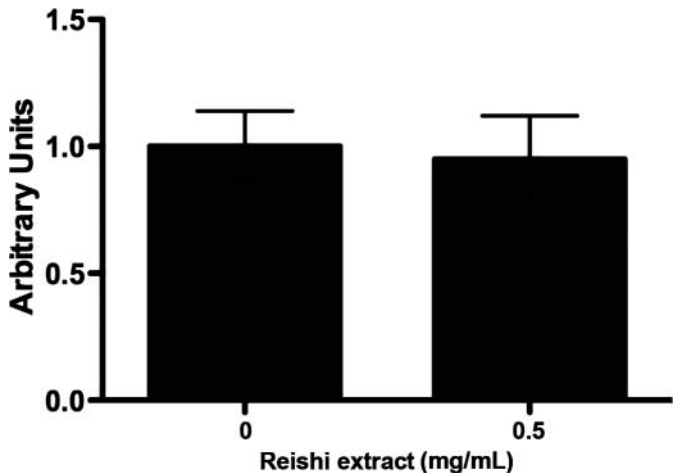

SUPPLEMENTARY FIG. 1. Reishi extract-mediated inhibition of E-cadherin does not occur at the mRNA level. SUM-149 cells were treated with or without Reishi extract for 24 h. Quantitative real time PCR analysis to assess CDH1 was done with 500 ng of RNA for CDH1 and GAPDH (endogenous control). The amount of CDH1 message was normalized to GAPDH levels and reported as relative value. Columns, mean from 3 independent experiments  $\pm$  SEM.
